1 **Influence of human cytomegalovirus glycoprotein O polymorphism on the inhibitory**  
2 **effect of soluble forms of trimer- and pentamer-specific entry receptors**

3

4 Nadja Brait,<sup>a</sup> Tanja Stögerer,<sup>a\*</sup> Julia Kalser,<sup>a\*</sup> Barbara Adler,<sup>b</sup> Ines Kunz,<sup>a</sup> Max Benesch,<sup>a</sup>  
5 Barbara Kropff,<sup>c</sup> Michael Mach,<sup>c</sup> Elisabeth Puchhammer-Stöckl,<sup>a</sup> Irene Görzer,<sup>a#</sup>

6

7 <sup>a</sup>Center for Virology, Medical University of Vienna, Vienna, Austria

8 <sup>b</sup>Max von Pettenkofer-Institute for Virology, Ludwig-Maximilians-University Munich,  
9 Munich, Germany

10 <sup>c</sup>Virologisches Institut, Klinische und Molekulare Virologie, Friedrich-Alexander Universität  
11 Erlangen-Nürnberg, Erlangen, Germany

12

13 Running head: Glycoprotein O polymorphism and entry inhibitors

14

15 # Address correspondence to Irene Görzer, [irene.goerzer@meduniwien.ac.at](mailto:irene.goerzer@meduniwien.ac.at).

16

17 \* Present address:

18 Julia Kalser, Blood Service for Vienna, Lower Austria and Burgenland, Austrian Red Cross,  
19 Vienna, Austria

20 Tanja Stögerer, Institut National de la Recherche Scientifique, Centre Armand-Frappier Santé  
21 Biotechnologie, Laval, Canada

22

23 N.B. and T.S. contributed equally to this work

24

25 Word count abstract: 250

26 Word count importance: 142

27 Word count text: 6.144

28

29 **Abstract**

30 Human cytomegalovirus (HCMV) envelope glycoprotein complexes, gH/gL/gO-trimer and  
31 gH/gL/UL128L-pentamer, are important for cell-free HCMV entry. While soluble Nrp2-Fc  
32 (sNrp2-Fc) interferes with epithelial/endothelial cell entry through UL128, soluble PDGFR $\alpha$ -  
33 Fc (sPDGFR $\alpha$ -Fc) interacts with gO thereby inhibiting infection of all cell types. Since gO is  
34 the most variable subunit we investigated the influence of gO polymorphism on the inhibitory  
35 capacities of sPDGFR $\alpha$ -Fc and sNRP2-Fc.

36 Accordingly, gO genotype 1c (GT1c) sequence was fully or partially replaced by gO GT2b,  
37 GT3, GT5 sequences in TB40-BAC4-luc background. All mutants were tested for fibroblast  
38 and epithelial cell infectivity, for virions' gO and gH content, and for infection inhibition by  
39 sPDGFR $\alpha$ -Fc and sNrp2-Fc.

40 Full-length and partial gO GT swapping may strongly alter the virions' gO and gH levels  
41 associated with enhanced epithelial cell infectivity. All gO GT mutants except recombinant gO  
42 GT1c/3 displayed a near-complete inhibition at 1.25  $\mu$ g/ml sPDGFR $\alpha$ -Fc on epithelial cells  
43 (98% versus 91%) and all on fibroblasts ( $\geq$  99%). While gO GT replacement did not influence  
44 sNrp2-Fc inhibition at 1.25  $\mu$ g/ml on epithelial cells (96%-98%), it rendered mutants with low  
45 gO levels moderately accessible to fibroblasts inhibition (20%-40%). In contrast to the steep  
46 sPDGFR $\alpha$ -Fc inhibition curves (slope  $>$ 1.0), sNrp2-Fc dose-response curves on epithelial cells  
47 displayed slopes of  $\sim$ 1.0 suggesting functional differences between these entry inhibitors.

48 Our findings suggest that targeting of gO-trimer rather than UL128-pentamer might be a  
49 promising target to inhibit infectivity independent of the cell type, gO polymorphism, and  
50 gO/gH content. However, intragenic gO recombination may lead to moderate resistance to  
51 sPDGFR $\alpha$ -Fc inhibition.

52

53 **Importance**

54 Human cytomegalovirus (HCMV) is known for its broad cell tropism as reflected by the  
55 different organs and tissues affected by HCMV infection. Hence, inhibition of HCMV entry  
56 into distinct cell types could be considered as a promising therapeutic option to limit cell-free  
57 HCMV infection. Soluble forms of cellular entry receptor PDGFR $\alpha$  rather than those of entry  
58 receptor neuropilin-2 inhibit infection of multiple cell types. sPDGFR $\alpha$  specifically interacts  
59 with gO of the trimeric gH/gL/gO envelope glycoprotein complex. HCMV strains may differ  
60 with respect to the virions' amount of trimer and the highly polymorphic gO sequence. In this  
61 study, we show that gO polymorphism rather than gO levels may affect the inhibitory capacity  
62 of sPDGFR $\alpha$ . The finding that gO intragenic recombination may lead to moderate evasion from  
63 sPDGFR $\alpha$  inhibition is of major value to the development of potential anti-HCMV therapeutic  
64 compounds based on sPDGFR $\alpha$ .

65

66 **Introduction**

67 Human cytomegalovirus (HCMV) is a widely spread pathogen which may cause substantial  
68 harm in congenitally infected newborns and in patients undergoing severe immunosuppressive  
69 therapy (1). Natural HCMV transmission follows mainly through body fluids such as urine or  
70 saliva (2). Upon infection, HCMV is spread throughout the body infecting many of the major  
71 somatic cell types like fibroblasts, smooth muscle cells, endothelial cells, epithelial cells,  
72 neurons, and leukocytes (3).

73 Two virion envelope glycoprotein (gp) complexes of human cytomegalovirus, the trimer  
74 gH/gL/gO and the pentamer gH/gL/UL128-131, are known to play crucial roles in host cell  
75 entry (4-6). These two complexes share the same gH/gL heterodimer forming either with gO or  
76 with UL128 a disulfide bridge with gL-Cys144 (7). Cell-free virions which are infectious for  
77 multiple cell types rather than fibroblasts alone, thus resemble *in vivo* cell tropism, must harbour  
78 both gp complexes (8-10). HCMV strains show large differences in the relative levels of trimer  
79 and pentamer incorporated in their virions (11). It is suggested that the trimer-to-pentamer ratio  
80 influences the infection efficiency for the respective cell types (8, 12, 13) and that a number of  
81 HCMV genes have the capacity to impact the composition of the two gH/gL complexes (14).

82 Large sequence comparison analysis has shown that, among all subunits of the two gp  
83 complexes, glycoprotein O (gO) exhibits by far the highest sequence polymorphisms with up  
84 to 23% amino acid diversity among gO sequences (15-17). All known gO sequences cluster  
85 into 5 major groups which can further be divided into 8 genotypes (18, 19). A closer inspection  
86 of gO gene sequences in circulating HCMV strains revealed that recombination among distinct  
87 strains may have occurred at several positions along the gO gene (16, 17, 20-22), arguing that  
88 recombination may be an important driving force of gO sequence evolution. Although it appears  
89 that all 8 gO genotypes can form stable trimers (11), it is poorly understood what role gO  
90 polymorphism plays in cell tropism. As recently shown gO genotypes may influence the  
91 efficiency of epithelial cell infection through specific sequence characteristics (23) or via

92 affecting the relative levels of gH/gL complexes (11, 13). Moreover, it has recently been  
93 reported that the accessibility of certain gH or gH/gL epitopes for monoclonal antibodies differs  
94 among HCMV strains probably due to the distinct gO genotype sequences of the respective  
95 strains (24).

96 Over the last few years, a number of cellular interaction partners for both, the trimer and the  
97 pentamer have been identified (14). One of these cellular receptors, platelet-derived growth  
98 factor receptor alpha (PDGFR $\alpha$ ), was identified to directly and specifically interact with gO  
99 parts of the trimer (25-27). This interaction enables entry of cell-free virions into fibroblasts,  
100 the only cell type which shows a high PDGFR $\alpha$  expression (28). Albeit, soluble forms of  
101 PDGFR $\alpha$  (sPDGFR $\alpha$ ) can severely inhibit not only entry into fibroblasts, but also entry into  
102 endothelial and epithelial cells (25-27), and first observations indicate that the inhibitory  
103 capacity of sPDGFR $\alpha$  is effective against several HCMV strains even when they harbour a  
104 different gO genotype sequence (26).

105 Neuropilin-2 (NRP2), another recently identified host cell receptor for HCMV, specifically  
106 interacts with the UL128 subunit of the pentamer (29). This interaction is required for entry  
107 into endothelial and epithelial cells, most likely through endocytosis, but seems to be  
108 dispensable for entry into fibroblasts. Accordingly, a soluble form of NRP2 (sNRP2) inhibits  
109 endothelial and epithelial infection but not fibroblasts (29). Both PDGFR $\alpha$  and NRP2 likely  
110 function as the primary entry receptors for the trimer and pentamer, respectively, however, the  
111 modes of entry downstream of receptor binding may substantially differ. In particular, it appears  
112 that the trimer functions at steps which are required for entry into all cell types (14) which  
113 makes sPDGFR $\alpha$  or derivatives thereof a promising therapeutic tool against HCMV (30, 31).

114 In the present study, we now aimed to assess how gO polymorphism influences the inhibitory  
115 capacity of sPDGFR $\alpha$  and sNRP2, respectively. To this end, we generated a set of TB40-BAC4-  
116 luc-derived HCMV gO genotype mutant strains, five of them harbour one of the major gO  
117 genotype sequences and 2 of them carry a recombinant gO genotypic form. We showed that

118 subtle to moderate differences in the inhibitory capacities of the two entry inhibitors, sPDGFR $\alpha$   
119 and sNRP2, are attributed to gO polymorphism.

120

## 121 **Results**

### 122 **Cell-free infectivity of HCMV strains upon swapping of gO genotype sequences**

123 In order to investigate the influence of gO polymorphisms on the cell entry inhibitors sPDGFR $\alpha$   
124 and sNRP2, we generated a panel of gO genotype mutant viruses, in which the parental gO  
125 genotype sequence GT1c of TB40-BAC4-luc was fully or partially replaced by another gO GT  
126 sequence (see Figure 1, and Supplementary Figure 1). Correctness of the whole UL and US  
127 regions of fibroblast-derived reconstituted viruses were validated by whole genome sequencing.  
128 All experiments were done with reconstituted virus stocks without further passaging. For  
129 comparison analyses and comprehensiveness both the parental strain, referred to as gO GT1c,  
130 and the previously generated gO GT mutant, gO GT4 (23), were included in all experiments.  
131 First, to assess the ability of the gO GT mutants to infect human foreskin fibroblasts (HFFs),  
132 cell-free virus stocks of gO GT1c and mutants were adjusted to a similar number of  
133 encapsidated genome equivalents (mean of 8.2 log<sub>10</sub> copies/ml). Infectivity was quantified by  
134 monitoring luciferase expression in cell lysates 2 days post infection. Relative light units  
135 (RLUs) are the read out for the extent of infection. The log<sub>10</sub> ratio of RLUs to encapsidated  
136 genomes was calculated and the fold change relative to gO GT1c was determined. Mutants and  
137 parental strain were incubated on the same plate to avoid inter-plate variability of RLU  
138 quantitation. As shown in Figure 2A, all gO GT mutants infected fibroblasts similarly efficient  
139 as gO GT1c.

140 Next, we determined the relative epithelial cell infectivity by simultaneously infecting both,  
141 epithelial cells and fibroblasts. Cell-free virus stocks were adjusted to achieve 300-1,500 RLUs  
142 in ARPE-19-infected cell lysates. Infection efficiencies were determined by luciferase assay 2  
143 days post infection and the ratios of epithelial cell to fibroblast RLUs were calculated (see

144 Figure 2B). Mutant gO GT3 and the two recombinant forms, GT1c/GT3 and GT3/GT1c, along  
145 with gO GT4 displayed a significantly higher epithelial cell infectivity compared to gO GT1c.  
146 In summary, the data show that gO GT swapping, either full-length or partial, does not impair  
147 the capacity to infect fibroblasts but seems to affect epithelial cell tropism.

148

#### 149 **Content of gO and gH in the envelope of gO GT mutant viruses**

150 Cell-free virions of parental strain TB40-BAC4-luc are characterized by high gO abundance  
151 and low UL128 expression. This is thought to result in a high trimer-to-pentamer ratio  
152 associated with a low efficiency for epithelial cell infection (12). Thus, we wanted to know  
153 whether the enhanced epithelial cell infectivity of gO GT3, gO GT1c/GT3 and gO GT3/GT1c  
154 results from changes in the trimer-to-pentamer ratio upon gO GT swapping. To this end,  
155 parental and mutant virions were purified from fibroblast supernatant and the amounts of gO  
156 and gH were determined by semi-quantitative western blot under reducing conditions. The total  
157 amount of virions was normalized to gB and/or major capsid protein (MCP). The gO content  
158 represents the amount of trimer and the gH level is assumed to indicate the overall amount of  
159 trimer and pentamer in virions. One representative immunoblot for each mutant is given in  
160 Figure 3, and the estimated virions' gO and gH contents are shown in Table 1. In comparison  
161 to gO GT1c the amount of virions' gO was severely reduced in gO GT3 (~ 80%), GT3/1c (~  
162 90%), GT1c/3 (~ 50%), a subtle reduction was found for gO GT5 (~ 30%), but no substantial  
163 changes for gO GT4 mutant virions. Notably, almost no gO was detectable in gO GT2b virions  
164 even when very high virion concentrations were used for immunoblotting (see Supplementary  
165 Figure 2). Although it cannot be excluded that gO GT2b virions harbour very low levels of gO  
166 it is more likely that the anti-gO antibody used in this study which is directed towards gO GT1c  
167 of TB40E (32) does not cross-react with gO GT2b while the gO genotypic forms GT3, GT4,  
168 and GT5 are well recognized (see Supplementary Figure 2). With regard to the gH content it  
169 appears that the mutant virions GT3 and GT1c/GT3 harbour 1.6 to 3.2 fold higher gH levels



170 whereas GT2b, GT4, and GT5 contain moderately lower levels as compared to gO GT1c.  
171 Hence, these data suggest a shift towards lower trimer-to-pentamer ratio upon full-length and  
172 partial swapping of GT3 sequences but not upon replacement of GT1c by GT4 and GT5  
173 sequences.

174

#### 175 **Inhibition of cell-free fibroblast and epithelial cell infectivity by soluble PDGFR $\alpha$ -Fc**

176 Since all gO GT mutants retained the ability to infect fibroblasts and epithelial cells, we were  
177 able to directly compare the inhibitory capacity of sPDGFR $\alpha$ -Fc between the five major gO  
178 genotypic and the two recombinant forms. The inhibition experiments were performed with a  
179 fixed amount of infectious viruses pre-incubated for 2 hours with a 2-fold dilution series of  
180 sPDGFR $\alpha$ -Fc ranging from 0.0025 to 0.625  $\mu$ g/ml. After another 2 hour-incubation on  
181 fibroblasts or epithelial cells, respectively, cells were washed and subsequently incubated with  
182 fresh medium for further 2 days. RLU were monitored by a luciferase assay and plotted against  
183 the concentration of sPDGFR $\alpha$ -Fc.

184 First, the appropriate amount of infectious input virus was determined using three different  
185 virus dilutions of parental strain gO GT1c. As shown in Figure 4A and 4B there was no  
186 substantial change in the overall shape of the dose-dependent inhibition over a wide range of  
187 input infectivity. Thus, for all further inhibition experiments the cell-free virus stocks were  
188 normalized to similar RLUs within the tested range (see Materials and Methods). In all mutants,  
189 cell-free infectivity was inhibited by sPDGFR $\alpha$ -Fc in a dose-dependent manner. One  
190 representative curve for gO GT1c and the gO GT mutants is shown in Figure 4C and 4D. The  
191 half-maximal inhibition (IC<sub>50</sub>) as calculated by non-linear regression ranged from 49 ng/ml to  
192 73 ng/ml for fibroblasts and from 24 ng/ml to 56 ng/ml for epithelial cells (see Table 2). None  
193 of the mutants' IC<sub>50</sub> value significantly differed from IC<sub>50</sub> of parental strain. Moreover, there  
194 was no difference between parental strain and mutants in the overall steep shape of the dose-  
195 response curves (slopes >1), neither in fibroblasts nor in epithelial cells, except for one of the

196 recombinant mutants, gO GT1c/3, in epithelial cells. This gO mutant showed a shallower dose-  
197 response curve with a slope of 1.0 to 2.6 (see Table 2). The slope parameter mathematically  
198 analogous to the Hill coefficient is a measure of cooperativity (33) in the binding of multiple  
199 ligands (e.g. sPDGFR $\alpha$ -Fc) to linked binding sites (e.g. gO). Dose-response curves with a slope  
200 of about 1.0 are indicative for non-cooperativity which means the ligand binds at each site  
201 independently. In contrast, steep curves with slopes much larger than 1.0 are thought to result  
202 from a form of positive cooperative effects upon ligand binding (33). Hence, these findings  
203 suggest that the presumed positive cooperativity is weakened when sPDGFR $\alpha$ -Fc binds to gO  
204 GT1c/3.

205 Next, we determined the maximal extent of inhibition at 1.25  $\mu$ g/ml sPDGFR $\alpha$ -Fc calculated  
206 as  $1 - (\text{RLU after pretreatment} / \text{RLU of untreated virus stocks})$ . The inhibition of fibroblast  
207 infectivity was almost complete ( $> 99\%$ ) and did not differ between gO GT1c and mutants (see  
208 Figure 4E). In epithelial cells, in contrast, one of the recombinant mutants, gO GT1c/3, retained  
209 a significantly higher infectivity (mean: 9%) at this inhibitor concentration compared to gO  
210 GT1c. The other mutants did not differ from the parental strain. The reduced epithelial cell  
211 inhibition of gO GT1c/3 by sPDGFR $\alpha$ -Fc is well in accordance with the shallower shape of the  
212 dose-response curve (Figure 4D). Notably, the inhibition efficiency was slightly less effective  
213 in epithelial cells ( $\sim 98 - 99\%$ ) than in fibroblasts for gO GT1c and the mutants, GT2b, GT3,  
214 and GT3/1c (see Figure 4E).

215 In summary, these findings show that not only the five major genotypic forms of gO are  
216 recognized by sPDGFR $\alpha$ -Fc but also recombinant forms of gO. Albeit, one recombinant version  
217 of gO seems to be less effectively inhibited by sPDGFR $\alpha$ -Fc on epithelial cells.

218

### 219 **Inhibition of cell-free fibroblast and epithelial cell infectivity by soluble NRP2-Fc**

220 It has recently been reported that soluble forms of NRP2 which specifically bind to UL128,  
221 inhibit epithelial cell infection while fibroblast infection remains largely unaffected (29). We

222 wanted to know whether alterations in the virions' gO and gH content upon gO GT swapping  
223 may indirectly affect the inhibitory capacity of sNRP2-Fc. To address this question, first we  
224 performed inhibition experiments on epithelial cells using a 2-fold dilution series of sNRP2-Fc  
225 (range: 0.0025 to 0.626  $\mu\text{g/ml}$ ) and a fixed amount of RLU-normalized gO GT virions as  
226 described for sPDGFR $\alpha$ -Fc. Two independent experiments were performed for each mutant  
227 along with the parental strain and one representative curve is shown in Figure 5A. The dose-  
228 dependent inhibition was similar between parental strain and gO GT mutants, the dose-response  
229 curves displayed slopes of about 1.0 (range: 0.7 to 2.1) and the IC<sub>50</sub> values ranged from 31 to  
230 90 ng/ml (see Table 2). These findings indicate that neither the gO genotypic form nor changes  
231 in the virion's gO content influences the capacity of sNRP2-Fc for epithelial cell inhibition.  
232 Finally, we wanted to assess the maximum inhibitory capacity of 1.25  $\mu\text{g/ml}$  sNRP2-Fc on  
233 epithelial cells and whether such high inhibitor concentrations also have an effect on fibroblast  
234 infectivity. As shown in Figure 5B, epithelial cell infectivity was 96% to 98% reduced in all  
235 mutant viruses and this did not significantly differ between parental strain and mutants.  
236 Interestingly, although the fibroblast infectivity was almost unaffected in parental strain and in  
237 two of the mutants, GT2b and GT5, a moderate reduction in fibroblast infectivity of 20% to  
238 40% was observed for the other mutants and this reached statistical significance for the  
239 recombinant mutant gO GT1c/3. From these data it appears that gO differences upon GT  
240 swapping may render mutant virions partially accessible to sNRP2-Fc inhibition on fibroblasts.

241

## 242 **Discussion**

243 The two envelope glycoprotein complexes, gH/gL/gO-trimer and gH/gL/UL128L-pentamer,  
244 which share the same gH/gL heterodimer, play major roles in HCMV cell entry. In the present  
245 study, we focussed on gO, the critical subunit of the trimer. A special hallmark of gO is its high  
246 polymorphism with an overall amino acid diversity of  $\sim 20\%$  (18, 19). To learn more about  
247 potential functional differences attributed to gO polymorphism, we fully or partially swapped

248 gO gene sequences in the otherwise identical TB40-BAC4-luc background, tested the set of gO  
249 mutants for their capability to infect fibroblasts and epithelial cells, for their relative  
250 composition of gO and gH in cell-free virions, and evaluated the inhibitory capacity of  
251 sPDGFR $\alpha$ -Fc in comparison to sNRP2 inhibition.

252 First, we demonstrate that gO GT swapping, either partial or full-length, does not substantially  
253 affect fibroblast infectivity but may lead to an increase in relative epithelial cell infectivity. In  
254 particular, the mutants gO GT3, GT3/1c, and GT1c/3, which displayed the strongest  
255 enhancement in epithelial cell infection, contained substantially lower gO but higher gH levels  
256 in their cell-free virions as compared to parental strain. Previous studies have revealed that gO  
257 and UL128 compete for binding to the same gL cysteine residue in gH/gL (7) which in turn  
258 regulates the trimer to pentamer ratio (7, 8) and this renders virions more infectious for  
259 fibroblasts (high trimer to pentamer ratio) or epithelial cells (low trimer to pentamer ratio) (11,  
260 12). Since parental strain TB40-BAC4-luc is characterized by vastly more gO than UL128  
261 accompanied by a low epithelial cell infectivity (12) it is likely that the opposite changes in gO  
262 and gH levels upon partial or full-length GT3 swapping cause a shift towards lower trimer to  
263 pentamer ratio which may well explain the increase in epithelial cell infectivity. The impact of  
264 the relative composition of gO and gH in terms of epithelial cell infectivity is further underlined  
265 by the observation that replacement of gO GT1c by GT5 which causes a subtle reduction in  
266 both, gO and gH, has no effect on epithelial cell infectivity. Similarly as recently reported, gO  
267 GT1b to GT5 swapping and vice versa has also no effect on gO expression levels (13).  
268 Together, these findings suggest that the relative abundance of gO and gH incorporated into  
269 cell-free virions is influenced by the gO genotypic form. Recently, UL148 has been identified  
270 to regulate the trimer to pentamer ratio by stabilizing gO within the endoplasmatic reticulum  
271 (34, 35). It is tempting to speculate that the regulatory capability of UL148 is influenced by the  
272 gO sequence. Additionally, it cannot be excluded that GT sequence-specific characteristics  
273 directly modify the capacity of cell-free virions for entry into epithelial cells, since gO GT4

274 displayed an enhanced epithelial cell tropism without substantial alterations in gO and gH  
275 abundance, as previously shown (23).

276 Remarkably, despite significant differences in epithelial cell tropism, the fibroblast infectivity  
277 was similar among the mutants and parental strain. These findings indicate that neither changes  
278 in gO and gH abundance nor gO GT sequence-specific characteristics affect the capacity for  
279 fibroblast infection. Moreover, these data lead to the conclusion that all of these gO genotypic  
280 forms can bind to the cellular fibroblast receptor PDGFR $\alpha$  with similar efficiency. Strikingly,  
281 a minimum level of gO on cell-free virions seems to be still sufficient for normal fibroblast  
282 infection under the tested *in vitro* conditions as in particular gO GT3 and gO GT1c/3 mutants  
283 display very low gO levels. Taken together, these observations provide clear evidence that gO  
284 polymorphism has a substantial impact on epithelial cell but not on fibroblast infectivity.  
285 Further investigations will clarify how differences in the gO and gH abundance and/or GT-  
286 specific sequence characteristics affect epithelial cell entry of cell-free virions.

287 Recombination among different HCMV strains appears to be a major driving force in HCMV  
288 evolution as shown by numerous studies (36). Recently, the recombination density throughout  
289 the genome was deeply investigated by whole genome sequence comparisons exploring past  
290 and recent recombination events as well (16, 20, 21). A particularly interesting finding was the  
291 identification of pervasive genome-wide recombination generating diversity both within and  
292 between genes (16, 21). So far, little is known about potential functional consequences for  
293 individual genes upon intragenic recombination. In the present study, we have now included  
294 two chimeric gO GT mutants, each of them carrying a recombinant gO genotypic form  
295 composed of GT1c and GT3 sequences. One of them, gO GT3/1c, harbours the recombination  
296 breakpoint within the conserved C-terminal part of gO and this mutant differs from full-length  
297 gO GT3 in only 4 amino acid residues. The recombination breakpoint of the other one, gO  
298 GT1c/3, is located in a small identical sequence stretch between GT1c and GT3 in the otherwise  
299 highly polymorphic N-terminal part of gO. Recombination resulted in a severely altered gO

300 sequence with an amino acid diversity of 9% from GT1c and of 10% from GT3. Strikingly,  
301 both recombinant gO mutants not only fully retained the ability to infect fibroblasts they even  
302 displayed an enhancement in epithelial cell infectivity comparable to full-length GT3 mutant.  
303 As discussed above, the change in gO and gH abundance may cause the observed epithelial cell  
304 phenotype. Accordingly, these findings indicate that recombination within the gO gene could  
305 be considered as an important function for HCMV to generate (i) gene diversity with or without  
306 modified functions and (ii) novel combinations of neighbouring loci even when they are highly  
307 diverse. This is well in concordance with previously reported sequencing data showing that  
308 recombination within gO may sporadically occur also *in vivo* despite a strong linkage between  
309 gO and the adjacent, partly overlapping gN gene (16, 17, 21, 22, 37).

310 Recent studies have shown that PDGFR $\alpha$  specifically interacts with the gO subunit of the trimer  
311 which is required for entry into fibroblasts (25-28). As soluble forms of PDGFR $\alpha$  or derivatives  
312 thereof can inhibit cell-free infection of several cell types (26) it appears that binding of  
313 sPDGFR $\alpha$  to gO interferes with trimer-mediated function(s) widely required for cell entry. We  
314 now demonstrate that representatives of the five major gO genotypic forms, GT1c, GT2b, GT3,  
315 GT4, and GT5, are similarly recognized by sPDGFR $\alpha$  and upon pretreatment with sPDGFR $\alpha$ -  
316 Fc both, fibroblast and epithelial cell infectivity was strongly inhibited. These data are well in  
317 line with previous reports showing the inhibitory capacity of sPDGFR $\alpha$  for several distinct  
318 HCMV strains (26). Notably, even at a concentration of 1.25 $\mu$ g/ml sPDGFR $\alpha$  we observed a  
319 residual infectivity of about 1 - 2% in epithelial cells, while in fibroblasts the inhibition was  
320 almost complete ( $\geq$  99%) similar as shown previously (27). Thus, it is tempting to speculate  
321 that a trimer-independent entry mechanism accounts for the residual infectivity. Alternatively,  
322 it is also possible that not all virions are neutralized at this concentration allowing for a residual  
323 infection.

324 Remarkably, one of the two recombinant mutants, gO GT1c/GT3, displayed a significantly  
325 lower sensitivity for sPDGFR $\alpha$  inhibition on epithelial cells than the other mutants while the

326 fibroblast inhibition was similarly effective. As mentioned above this mutant comprises its  
327 recombination site in the highly polymorphic N-terminal region of the protein, which only  
328 recently was suggested to contain the PDGFR $\alpha$  receptor binding domain (31). By mutational  
329 analysis the authors identified a small stretch from amino acid 117 to 121 causing the strongest  
330 impairment of sPDGFR $\alpha$  binding to virus particles and consequently also a reduced virus  
331 penetration into fibroblasts. Although this peptide site overlaps with the recombination site of  
332 GT1c/GT3, the specific sequence remained unchanged upon recombination suggesting that  
333 sPDGFR $\alpha$  binding to this recombinant form of gO is not impaired. This presumption fits well  
334 to the finding that gO GT1c/GT3 mutant does not display a phenotype in fibroblast infectivity  
335 while mutants with a mutation in this particular peptide sequence showed reduced penetration  
336 into fibroblasts (31). Hence, we assume that the impaired sPDGFR $\alpha$  inhibition for gO  
337 GT1c/GT3 mutant on epithelial cells is not caused by a lower binding of sPDGFR $\alpha$  to gO but  
338 rather by an impaired interference with a downstream entry step mediated by the trimer.  
339 The assumption that binding of sPDGFR $\alpha$  to gO-trimer affects more entry properties than the  
340 unique block of the receptor binding site is further strengthened by our findings that inhibition  
341 with 2-fold serial dilutions of sPDGFR $\alpha$  led to steep dose-response curves in both fibroblasts  
342 and epithelial cells. Such steep inhibition curves with a slope of much greater than 1 are thought  
343 to result from a form of positive cooperative effects upon ligand binding (33). Remarkably, the  
344 steepness of the sPDGFR $\alpha$ -Fc dose-inhibition curves were not affected by the gO content in  
345 virions, nor by the amount of input virions. The underlying mechanisms are not yet clearly  
346 understood but following scenarios may explain why sPDGFR $\alpha$ -bound virions become rapidly  
347 inactive for cell entry: binding of sPDGFR $\alpha$  to virions leads to (i) steric hindrance and/or  
348 conformational changes of the gO-trimer which affects multiple sPDGFR $\alpha$  binding sites on the  
349 virion, (ii) cluster formation of trimers and/or other envelope complexes which causes that  
350 multiple gO binding sites on the virion are rapidly blocked, (iii) changes of gB prefusion into  
351 gB postfusion conformation (under the assumption that the trimer stabilizes the gB prefusion

352 conformation) which renders virions inactive for entry, and/or (iv) cluster formation of multiple  
353 virions. Although these proposed scenarios await further clarification, from our data it becomes  
354 clear that a presumed cooperative effect triggered by sPDGFR $\alpha$  does not differ among the five  
355 major gO genotypes.

356 When we compared the dose-response curves of sPDGFR $\alpha$  with those of sNRP2, a recently  
357 identified entry inhibitor for epithelial cells (29), it becomes obvious that the mechanisms of  
358 action substantially differ between these two entry inhibitors. The dose-response curves of  
359 sNRP2 displayed a slope of about 1 – 2 meaning that binding of sNRP2 to its interaction partner  
360 UL128 of the pentamer causes no further effects beside the block of the binding site. There was  
361 also seen no difference among the gO GT mutants and parental strain indicating that neither gO  
362 abundance nor gO GT-specific characteristics influence the binding efficiency of sNRP2.  
363 Notably, all gO mutants along with parental strain displayed a residual epithelial cell infectivity  
364 of about 2-3% at a concentration of 1.25  $\mu$ g/ml sNRP2. Whether an NRP2-independent entry  
365 pathway circumvents a complete inhibition or whether not all virions are neutralized by this  
366 concentration of sNRP2 yet awaits further investigation. As recently reported, fibroblast  
367 infection is largely unaffected by sNRP2 (29). In overall, this finding is well in concordance  
368 with our data. However, we observed a subtle inhibition of fibroblast infectivity by high  
369 concentrations of sNRP2 in those mutant virions which displayed very low amounts of gO.  
370 Thus, it is presumable that binding of high amounts of sNRP2 to virions lead to steric hindrance  
371 of the trimer which becomes visible only for virions with low gO levels.

372 In conclusion, in this study we show that the trimer to pentamer ratio which is substantially  
373 affected by gO polymorphism has no influence on the inhibitory capacity of sPDGFR $\alpha$  but may  
374 render virions slightly susceptible to sNRP2 inhibition on fibroblasts. When sPDGFR $\alpha$  or  
375 derivatives thereof are considered for a therapeutic option to HCMV infection it should be taken  
376 into account that gO intragenic recombination may lead to partial evasion from sPDGFR $\alpha$   
377 inhibition.



378 **Material and Methods**

379 **Cells**

380 Human foreskin fibroblasts (HFFs) were cultured in minimum essential medium Eagle (MEM;  
381 Sigma-Aldrich, St. Louis, Missouri) supplemented with 10% heat-inactivated fetal bovine  
382 serum (FBS; Capricorn Scientific, Ebsdorfergrund, Germany) and 0.5% neomycin (Sigma-  
383 Aldrich). Human adult retinal pigmented epithelial cells (ARPE-19; ATCC, Manassas,  
384 Virginia) were cultured in Dulbecco's modified Eagle medium/nutrient mixture F12 (PAN-  
385 Biotech, Aidenbach, Germany) supplemented with 10% FBS and 1% penicillin-streptomycin  
386 (Thermo Fisher) or in MEM supplemented with 10% FBS and 0.5% neomycin.

387

388 **Generation of gO mutant BAC clones by en passant mutagenesis**

389 All HCMV gO mutant strains were derived from the bacterial artificial chromosome (BAC)  
390 clone TB40-BAC4-luc (38). By "en passant" mutagenesis in *E.coli* GS1783 (39), the gO GT1c  
391 sequence of TB40-BAC4-luc was fully exchanged by GT2b, GT3, and GT5 respectively, and  
392 partially by gO GT3, either at the 5' or 3' end of gO GT1c ORF. For generation of full-length  
393 gO BAC mutants, a gO deletion mutant was used in which the whole gO ORF sequence was  
394 deleted. This ensured recombination between transfer plasmid and BAC-DNA solely upstream  
395 and downstream of the gO ORF sequence. For generation of recombinant BAC mutants,  
396 GT3/1c and GT1c/3, original TB40-BAC4-luc BAC DNA was used and both chimeric versions  
397 resulted from recombination within the gO GT1c ORF. First, a set of recombination cassettes  
398 were generated and the primer pairs used are listed in Supplementary table 1. For this, inserts  
399 containing a kanamycin resistance gene, flanked on one side by an 18-bp I-Sce I restriction  
400 sequence and a gO GT-specific 50-bp sequence, and on both sides by a Sac I or Nde I restriction  
401 site, respectively, were generated by PCR using pEP-Kan-S (kindly provided by Nikolaus  
402 Osterrieder). Second, each individual insert was cloned into the corresponding restriction site  
403 of gO GT sequence carried by pEX-A258 ordered from Eurofins Genomics (Luxembourg). The

404 resulting transfer plasmids were used as template to generate the PCR-derived recombination  
405 cassettes containing extensions of ~50 bp sequences on each end for homologous  
406 recombination. The recombination cassettes were electroporated into recombination-competent  
407 *E.coli* GS1783 carrying the full-length or gO-deleted TB40-BAC4-luc DNA. After  
408 electroporation, recombination-positive *E.colis* were subjected to kanamycin selection, and the  
409 introduced non-HCMV sequences were removed within *E.coli* by cleavage at the I-Sce I site  
410 and a second red recombination. Positive kanamycin-sensitive, chloramphenicol-resistant  
411 bacteria colonies were selected. Finally, recombinant BAC DNAs were isolated from positive  
412 clones and the correctness of the BAC DNA sequence was verified by whole genome  
413 sequencing (see below). Further, overnight *E.coli* cultures of positive clones were stored at -80  
414 °C until further use.

415

#### 416 **BAC-derived gO mutant HCMV strains**

417 Infectious viruses were generated by reconstitution as described previously (23). Briefly,  
418 mutant BAC DNAs were purified from *E.coli* using the Nucleobond BAC100 kit (Macherey-  
419 Nagel, Düren, Germany). The day before transfection, HFFs were seeded in 6-well plates (3 x  
420 10<sup>5</sup> cells/well) and then 2 µg of BAC DNA, 1 µg of pCMV71 DNA (plasmid was kindly  
421 provided by Mark Stinski, University of Iowa) and 9 µl of ViaFect reagent (Promega, Madison,  
422 Wisconsin) were mixed together with 100 µl of MEM without antibiotics, incubated for 15 min  
423 at room temperature and then added to the cells. 24 h after transfection, cells were washed with  
424 PBS and fresh MEM with antibiotics was added. One week after transfection, cells were  
425 trypsinized and transferred into 25 cm<sup>2</sup> cell culture flasks. When CPE was 90-100%,  
426 supernatants were cleared by centrifugation at 4°C for 20 min at 4,000 x g and stored as cell-  
427 free viral stocks in aliquots at -80 °C. For infection and inhibition analyses, all aliquots were  
428 used only once to avoid multiple freeze-thaw cycles. Furthermore, one aliquot per reconstitution  
429 was subjected (i) to next generation sequencing to confirm the correctness of the complete UL

430 and US genomic regions, (ii) to DNase treatment to assess the amount of encapsidated genomes,  
431 and (iii) to RLU measurements in order to normalize virus stocks in subsequent experiments.  
432 Two independent reconstitutions were performed for each mutant.

433

#### 434 **Whole genome sequencing**

435 DNA from BAC purification (as described above) and extracted DNA from DNase-treated or  
436 untreated viral stocks from HFF cell culture supernatants upon reconstitution were quantified  
437 using the Qubit 2.0 fluorometer (Thermo Fisher) according to the manufacturer's instructions.  
438 One to two ng of DNA per sample were taken for library preparation using the Nextera XT  
439 DNA Library Preparation Kit and uniquely indexed samples using the Nextera XT Index Kit  
440 were pooled and sequenced together (both Illumina, San Diego, California). Pooled libraries  
441 were sequenced with paired-end reads (2x150-250) on a MiSeq system using v2 or v3  
442 sequencing reaction chemistry (Illumina). Data were analyzed by CLC genomics workbench  
443 v12 software (Qiagen). Low-quality reads were trimmed and in average 52 - 80% of reads  
444 mapped to the reference genome.

445

#### 446 **Determination of encapsidated HCMV genomes in virus stocks**

447 In order to remove non-encapsidated viral DNA and free cellular DNA, fibroblast-derived virus  
448 stocks were treated with TurboDNase (Thermo Fisher). For this, 100  $\mu$ l of master mix (73  $\mu$ l  
449 H<sub>2</sub>O, 20  $\mu$ l 10x DNase buffer, 5  $\mu$ l 10x PBS, 2  $\mu$ l TurboDNase (2 u/ $\mu$ l)) were added to 100  $\mu$ l  
450 of sample and incubated for 1 h at 37°C in a thermoshaker at 1,400 rpm. Immediately thereafter,  
451 the total reaction volume was added to 2ml lysis buffer and DNA was extracted using the bead-  
452 based NucliSens EasyMag extractor (BioMérieux, Marcy-l'Étoile, France) according to the  
453 manufacturer's protocol. DNA was eluted in 50  $\mu$ l of nuclease-free H<sub>2</sub>O.

454

#### 455 **HCMV-specific quantitative PCR**

456 HCMV-DNA was quantitated using an in-house real-time qPCR amplifying a conserved region  
457 within US17 (forward primer GCGTGCTTTTTAGCCTCTGCA (10 pM), the reverse primer  
458 AAAAGTTTGTGCCCAACGGTA (10 pM), TaqMan probe FAM-TGATCGGCGTTATCG  
459 CGTTCTTGATC-TAMRA (2 pM)) as previously described (23).

460

#### 461 **Normalization of parental and mutant virus stocks**

462 The firefly luciferase gene of HCMV strain TB40-BAC4-luc allows to monitor relative light  
463 units (RLUs) in infected cell lysates as a read out for infection efficiency (40). For  
464 normalization of parental strain and mutant virus stocks to similar RLUs, HFFs and ARPE-19  
465 cells were seeded in white, clear, flat-bottom 96-well plates (Corning, Corning, New York) at  
466 a density of  $1 \times 10^4$  cells/well. The following day, viral stocks were serially 2-fold diluted in  
467 cell culture medium and 100  $\mu$ l of viral dilution per well were used to infect the cells in  
468 triplicates for 2 h at 37 °C. Cells were washed three times with PBS, supplied with 100  $\mu$ l of  
469 medium and incubated further at 37 °C for 2 days. RLUs were determined by luciferase assay  
470 of cell lysates according to the manufacturer's protocol (SteadyGlo Luciferase Assay System,  
471 Promega) and measured in a Victor Light 1420 plate reader (PerkinElmer, Waltham,  
472 Massachusetts). Mean RLUs of triplicates were calculated for normalization. For inhibition  
473 assays viral stock dilutions generating 1,000 to 20,000 RLUs for both, HFFs and ARPE-19 cells  
474 were used. For determination of relative epithelial cell infectivity viral stock dilutions  
475 generating 300-1,500 RLUs in ARPE-19 cells were used.

476

#### 477 **Fibroblast infection efficiency**

478 HFFs were seeded in white, clear, flat-bottom 96-well plates (Corning, Corning, New York) at  
479 a density of  $1 \times 10^4$  cells/well. The following day, viral stocks were diluted to similar number  
480 of encapsidated genomes (range: 8.2 to 9.2 log<sub>10</sub> genome copies/ml) in cell culture medium as  
481 previously determined and 100  $\mu$ l of viral dilution per well were used to infect the cells in

482 triplicates for 2 h at 37 °C. Cells were washed three times with PBS, supplied with 100 µl of  
483 medium and incubated further at 37 °C for 2 days before monitoring mean RLUs of technical  
484 triplicates. In parallel, 5 µl of the viral dilution was used to determine the actual number of  
485 encapsidated genomes used for infection. The ratio of log<sub>10</sub> RLUs to log<sub>10</sub> encapsidated  
486 genomes of parental strain was set at 1.0 and the fold change of the mutants as compared to  
487 parental strain was calculated. Three to four independent experiments per mutant were  
488 performed.

489

#### 490 **Relative epithelial cell infectivity**

491 The same viral stock dilution was used for infection of both fibroblasts and epithelial cells each  
492 seeded in white, clear, flat-bottom 96-well plates at a density of 1 x 10<sup>4</sup> cells/well one day  
493 before infection. Two days after infection, RLUs were determined by luciferase assay as  
494 mentioned above and the epithelial to fibroblast RLU ratio was calculated. All experiments  
495 were performed in technical triplicates and three to four independent experiments were  
496 performed.

497

#### 498 **Production of purified virions for immunoblotting**

499 Supernatants from infected HFFs were harvested when cells displayed > 90% CPE and then  
500 clarified by centrifugation at 4,000 x g for 30 min at 4 °C. After filtration through a 0.45 µm  
501 filter (Whatman, GE Healthcare Life Sciences, Thermo Fisher) viruses were concentrated by  
502 centrifugation at 4 °C using vivaspin 20 concentrators with a molecular weight cutoff of 100K  
503 (Sartorius, Göttingen, Germany). Thereafter, virions were purified by ultracentrifugation  
504 through a 20% sucrose TAN (0.05 M triethanolamine, 0.1 M NaCl, pH 8.0) cushion for 80 min  
505 at 70,000 x g at 4 °C and the pellets were gently resuspended in TAN buffer on ice and stored  
506 in aliquots at -80 °C until further use.

507

508 **Western blot analysis**

509 For sample preparation, virus stocks were mixed undiluted or diluted in TAN buffer with an  
510 equal volume of reducing 2x sample buffer (125 mM Tris/Cl pH 6.8, 6% SDS, 10% glycerol,  
511 10% 2-mercaptoethanol, 0.01% bromophenolblue) and incubated on ice for 10 min before  
512 boiling at 95 °C for 10 min. Samples were separated on 10% SDS PAGE gels together with a  
513 high-range rainbow marker (Amersham ECL High-Range Rainbow Molecular Weight Marker,  
514 GE Healthcare, UK). Separated proteins were transferred to polyvinylidene difluoride (PVDF)  
515 membranes (Immun-Blot, Bio-Rad, California, USA) in blotting buffer (40 mM Tris, 39 mM  
516 glycine, 1.3 mM SDS, 20% methanol), which were then incubated overnight in blocking buffer  
517 (PBS, 1% BSA, 0.1% Tween-20) at 4 °C. All antibodies (Abs) were diluted in blocking buffer.  
518 Primary mouse anti-gH (AP86-SA4) and anti-MCP monoclonal antibodies (mAbs), anti-gO.02  
519 mAb, and gB antibody (2F12; Abcam, Cambridge, UK) were incubated for 2 h at RT. Sheep,  
520 anti-mouse IgG-HRP (Amersham, GE Healthcare, UK) was used as secondary antibody and  
521 incubated for 1 h at RT. SuperSignal West Femto Maximum Sensitivity substrate (Thermo  
522 Fisher) was applied for gO detection according to the manufacturer's instructions and Pierce  
523 ECL Western Blotting Substrate (Thermo Fisher) for gH, MCP, and gB detection.  
524 Chemiluminescent signals were visualized and analyzed using the ChemiDoc Imager and the  
525 Image Lab 6.0 software (both Bio-Rad).

526

527 **Inhibition assays**

528 Cells were seeded in white, clear, flat-bottom 96-well plates at a density of  $1 \times 10^4$  cells/well  
529 the day before infection. A fixed amount of virus as determined by RLU normalization was pre-  
530 incubated with serial dilutions of soluble forms of PDGFR $\alpha$ -Fc or NRP2-Fc, respectively, for  
531 2 hours before infection. Two hours after infection cells were washed twice with 1x PBS,  
532 supplied with 100  $\mu$ l medium per well and further incubated for 2 days before subjected to  
533 luciferase assay. Total RLUs and percentage relative to RLUs of mock-preincubated controls

534 were calculated. Two to five independent experiments per mutant viruses were performed and  
535 all experiments were carried out in technical triplicates. Another independently reconstituted  
536 BAC-derived virus per mutant was used to confirm the results.

537

#### 538 **Statistical analyses:**

539 To compare relative epithelial cell infectivity (Figure 2) and percentage of infection after pre-  
540 treatment with soluble entry inhibitors, sPDGFR $\alpha$  and sNRP2, respectively, (Figures 4 and 5)  
541 between gO GT1c and gO GT mutants one-way ANOVA and Tukey' tests for multiple  
542 comparison were used. Mean RLU values from three to five independently repeated  
543 experiments were used for statistical analyses. *P* values < 0.05 were considered significant.  
544 GraphPad Prism version 7.01 was used for statistical analyses.

545

#### 546 **Acknowledgements**

547 We are very grateful to Michaela Binder, Sylvia Malik, Barbara Dalmatiner, and Andreas  
548 Rohorzka for excellent technical support. We thank Nikolaus Osterrieder for generously  
549 providing the plasmid pEP-Kan-S for BAC mutagenesis.

550 Funding for this research was provided by a grant from the Austrian Science Fund (FWF) to  
551 I.G. (project number: P26420-B13). The funders had no role in study design, data collection  
552 and interpretation, or the decision to submit the work for publication.

553

#### 554 **Additional Information**

555 Supplementary Information is provided.

556

557

558 **References**

559

- 560 1. Britt SBBaWJ. 2013. Synopsis of Clinical Aspects of Human Cytomegalovirus Disease.  
561 *In* Reddehase MJ (ed), Cytomegaloviruses: From Molecular Pathogenesis to  
562 Intervention, vol 1. Caister Academic Press.
- 563 2. Cannon MJ, Schmid DS, Hyde TB. 2010. Review of cytomegalovirus seroprevalence  
564 and demographic characteristics associated with infection. *Rev Med Virol* 20:202-13.
- 565 3. Sinzger C, Digel M, Jahn G. 2008. Cytomegalovirus cell tropism. *Current topics in*  
566 *microbiology and immunology* 325:63-83.
- 567 4. Huber MT, Compton T. 1998. The human cytomegalovirus UL74 gene encodes the  
568 third component of the glycoprotein H-glycoprotein L-containing envelope complex.  
569 *Journal of virology* 72:8191-7.
- 570 5. Wang D, Shenk T. 2005. Human cytomegalovirus virion protein complex required for  
571 epithelial and endothelial cell tropism. *Proceedings of the National Academy of*  
572 *Sciences of the United States of America* 102:18153-8.
- 573 6. Wang D, Shenk T. 2005. Human cytomegalovirus UL131 open reading frame is  
574 required for epithelial cell tropism. *Journal of virology* 79:10330-8.
- 575 7. Ciferri C, Chandramouli S, Donnarumma D, Nikitin PA, Cianfrocco MA, Gerrein R,  
576 Feire AL, Barnett SW, Lilja AE, Rappuoli R, Norais N, Settembre EC, Carfi A. 2015.  
577 Structural and biochemical studies of HCMV gH/gL/gO and Pentamer reveal mutually  
578 exclusive cell entry complexes. *Proceedings of the National Academy of Sciences of*  
579 *the United States of America* 112:1767-72.
- 580 8. Zhou M, Lanchy JM, Ryckman BJ. 2015. Human Cytomegalovirus gH/gL/gO Promotes  
581 the Fusion Step of Entry into All Cell Types, whereas gH/gL/UL128-131 Broadens  
582 Virus Tropism through a Distinct Mechanism. *Journal of virology* 89:8999-9009.



- 583 9. Jiang XJ, Adler B, Sampaio KL, Digel M, Jahn G, Ettischer N, Stierhof YD, Scrivano  
584 L, Koszinowski U, Mach M, Sinzger C. 2008. UL74 of human cytomegalovirus  
585 contributes to virus release by promoting secondary envelopment of virions. *J Virol*  
586 82:2802-12.
- 587 10. Wille PT, Knoche AJ, Nelson JA, Jarvis MA, Johnson DC. 2010. A human  
588 cytomegalovirus gO-null mutant fails to incorporate gH/gL into the virion envelope and  
589 is unable to enter fibroblasts and epithelial and endothelial cells. *Journal of virology*  
590 84:2585-96.
- 591 11. Zhou M, Yu Q, Wechsler A, Ryckman BJ. 2013. Comparative analysis of gO isoforms  
592 reveals that strains of human cytomegalovirus differ in the ratio of gH/gL/gO and  
593 gH/gL/UL128-131 in the virion envelope. *Journal of virology* 87:9680-90.
- 594 12. Murrell I, Tomasec P, Wilkie GS, Dargan DJ, Davison AJ, Stanton RJ. 2013. Impact of  
595 sequence variation in the UL128 locus on production of human cytomegalovirus in  
596 fibroblast and epithelial cells. *Journal of virology* 87:10489-500.
- 597 13. Zhang L, Zhou M, Stanton R, Kamil J, Ryckman BJ. 2018. Expression Levels of  
598 Glycoprotein O (gO) Vary between Strains of Human Cytomegalovirus, Influencing the  
599 Assembly of gH/gL Complexes and Virion Infectivity. *Journal of virology* 92.
- 600 14. Nguyen CC, Kamil JP. 2018. Pathogen at the Gates: Human Cytomegalovirus Entry  
601 and Cell Tropism. *Viruses* 10.
- 602 15. Dolan A, Cunningham C, Hector RD, Hassan-Walker AF, Lee L, Addison C, Dargan  
603 DJ, McGeoch DJ, Gatherer D, Emery VC, Griffiths PD, Sinzger C, McSharry BP,  
604 Wilkinson GW, Davison AJ. 2004. Genetic content of wild-type human  
605 cytomegalovirus. *J Gen Virol* 85:1301-12.
- 606 16. Sijmons S, Thys K, Mbong Ngwese M, Van Damme E, Dvorak J, Van Loock M, Li G,  
607 Tachezy R, Busson L, Aerssens J, Van Ranst M, Maes P. 2015. High-throughput  
608 analysis of human cytomegalovirus genome diversity highlights the widespread

- 609 occurrence of gene-disrupting mutations and pervasive recombination. *Journal of*  
610 *virology*.
- 611 17. Suarez NM, Wilkie GS, Hage E, Camiolo S, Holton M, Hughes J, Maabar M, Vattipally  
612 SB, Dhingra A, Gompels UA, Wilkinson GWG, Baldanti F, Furione M, Lillieri D,  
613 Arossa A, Ganzenmueller T, Gerna G, Hubacek P, Schulz TF, Wolf D, Zavattoni M,  
614 Davison AJ. 2019. Human Cytomegalovirus Genomes Sequenced Directly From  
615 Clinical Material: Variation, Multiple-Strain Infection, Recombination, and Gene Loss.  
616 *The Journal of infectious diseases* 220:781-791.
- 617 18. Mattick C, Dewin D, Polley S, Sevilla-Reyes E, Pignatelli S, Rawlinson W, Wilkinson  
618 G, Dal Monte P, Gompels UA. 2004. Linkage of human cytomegalovirus glycoprotein  
619 gO variant groups identified from worldwide clinical isolates with gN genotypes,  
620 implications for disease associations and evidence for N-terminal sites of positive  
621 selection. *Virology* 318:582-97.
- 622 19. Stanton R, Westmoreland D, Fox JD, Davison AJ, Wilkinson GW. 2005. Stability of  
623 human cytomegalovirus genotypes in persistently infected renal transplant recipients. *J*  
624 *Med Virol* 75:42-6.
- 625 20. Cudini J, Roy S, Houldcroft CJ, Bryant JM, Depledge DP, Tutill H, Veys P, Williams  
626 R, Worth AJJ, Tamuri AU, Goldstein RA, Breuer J. 2019. Human cytomegalovirus  
627 haplotype reconstruction reveals high diversity due to superinfection and evidence of  
628 within-host recombination. *Proceedings of the National Academy of Sciences of the*  
629 *United States of America* 116:5693-5698.
- 630 21. Lassalle F, Depledge DP, Reeves MB, Brown AC, Christiansen MT, Tutill HJ, Williams  
631 RJ, Einer-Jensen K, Holdstock J, Atkinson C, Brown JR, van Loenen FB, Clark DA,  
632 Griffiths PD, Verjans G, Schutten M, Milne RSB, Balloux F, Breuer J. 2016. Islands of  
633 linkage in an ocean of pervasive recombination reveals two-speed evolution of human  
634 cytomegalovirus genomes. *Virus evolution* 2:vew017.

- 635 22. Yan H, Koyano S, Inami Y, Yamamoto Y, Suzutani T, Mizuguchi M, Ushijima H,  
636 Kurane I, Inoue N. 2008. Genetic linkage among human cytomegalovirus glycoprotein  
637 N (gN) and gO genes, with evidence for recombination from congenitally and post-  
638 natally infected Japanese infants. *J Gen Virol* 89:2275-9.
- 639 23. Kalsner J, Adler B, Mach M, Kropff B, Puchhammer-Stockl E, Gorzer I. 2017.  
640 Differences in Growth Properties among Two Human Cytomegalovirus Glycoprotein  
641 O Genotypes. *Frontiers in microbiology* 8:1609.
- 642 24. Cui X, Freed DC, Wang D, Qiu P, Li F, Fu TM, Kauvar LM, McVoy MA. 2017. Impact  
643 of Antibodies and Strain Polymorphisms on Cytomegalovirus Entry and Spread in  
644 Fibroblasts and Epithelial Cells. *Journal of virology* 91.
- 645 25. Kabanova A, Marcandalli J, Zhou T, Bianchi S, Baxa U, Tsybovsky Y, Lilleri D,  
646 Silacci-Fregni C, Foglierini M, Fernandez-Rodriguez BM, Druz A, Zhang B, Geiger R,  
647 Pagani M, Sallusto F, Kwong PD, Corti D, Lanzavecchia A, Perez L. 2016. Platelet-  
648 derived growth factor-alpha receptor is the cellular receptor for human cytomegalovirus  
649 gHgLgO trimer. *Nature microbiology* 1:16082.
- 650 26. Stegmann C, Hochdorfer D, Lieber D, Subramanian N, Stohr D, Laib Sampaio K,  
651 Sinzger C. 2017. A derivative of platelet-derived growth factor receptor alpha binds to  
652 the trimer of human cytomegalovirus and inhibits entry into fibroblasts and endothelial  
653 cells. *PLoS pathogens* 13:e1006273.
- 654 27. Wu Y, Prager A, Boos S, Resch M, Brizic I, Mach M, Wildner S, Scrivano L, Adler B.  
655 2017. Human cytomegalovirus glycoprotein complex gH/gL/gO uses PDGFR-alpha as  
656 a key for entry. *PLoS pathogens* 13:e1006281.
- 657 28. Wu K, Oberstein A, Wang W, Shenk T. 2018. Role of PDGF receptor-alpha during  
658 human cytomegalovirus entry into fibroblasts. *Proceedings of the National Academy of  
659 Sciences of the United States of America* 115:E9889-E9898.

- 660 29. Martinez-Martin N, Marcandalli J, Huang CS, Arthur CP, Perotti M, Foglierini M, Ho  
661 H, Dosey AM, Shriver S, Payandeh J, Leitner A, Lanzavecchia A, Perez L, Ciferri C.  
662 2018. An Unbiased Screen for Human Cytomegalovirus Identifies Neuropilin-2 as a  
663 Central Viral Receptor. *Cell* 174:1158-1171 e19.
- 664 30. Stegmann C, Abdellatif ME, Laib Sampaio K, Walther P, Sinzger C. 2016. Importance  
665 of highly conserved peptide sites of HCMV gO for the formation of the gH/gL/gO  
666 complex. *Journal of virology*.
- 667 31. Stegmann C, Rothemund F, Laib Sampaio K, Adler B, Sinzger C. 2019. The N  
668 Terminus of Human Cytomegalovirus Glycoprotein O Is Important for Binding to the  
669 Cellular Receptor PDGFRalpha. *Journal of virology* 93.
- 670 32. Laib Sampaio K, Stegmann C, Brizic I, Adler B, Stanton RJ, Sinzger C. 2016. The  
671 contribution of pUL74 to growth of human cytomegalovirus is masked in the presence  
672 of RL13 and UL128 expression. *The Journal of general virology* 97:1917-27.
- 673 33. Hill AV. 1910. A new mathematical treatment of changes of ionic concentration in  
674 muscle and nerve under the action of electric currents, with a theory as to their mode of  
675 excitation. *The Journal of physiology* 40:190-224.
- 676 34. Li G, Nguyen CC, Ryckman BJ, Britt WJ, Kamil JP. 2015. A viral regulator of  
677 glycoprotein complexes contributes to human cytomegalovirus cell tropism.  
678 *Proceedings of the National Academy of Sciences of the United States of America*  
679 112:4471-6.
- 680 35. Nguyen CC, Siddiquey MNA, Zhang H, Li G, Kamil JP. 2018. Human  
681 Cytomegalovirus Tropism Modulator UL148 Interacts with SEL1L, a Cellular Factor  
682 That Governs Endoplasmic Reticulum-Associated Degradation of the Viral Envelope  
683 Glycoprotein gO. *Journal of virology* 92.

- 684 36. Puchhammer-Stöckl E, Görzer I. 2011. Human cytomegalovirus: an enormous variety  
685 of strains and their possible clinical significance in the human host. *Future Virology*  
686 6:259-271.
- 687 37. Görzer I, Kerschner H, Redlberger-Fritz M, Puchhammer-Stöckl E. 2010. Human  
688 cytomegalovirus (HCMV) genotype populations in immunocompetent individuals  
689 during primary HCMV infection. *J Clin Virol* 48:100-3.
- 690 38. Scrivano L, Sinzger C, Nitschko H, Koszinowski UH, Adler B. 2011. HCMV spread  
691 and cell tropism are determined by distinct virus populations. *PLoS pathogens*  
692 7:e1001256.
- 693 39. Tischer BK, Smith GA, Osterrieder N. 2010. En passant mutagenesis: a two step  
694 markerless red recombination system. *Methods in molecular biology* 634:421-30.
- 695 40. Scrivano L, Sinzger C, Nitschko H, Koszinowski UH, Adler B. 2011. HCMV spread  
696 and cell tropism are determined by distinct virus populations. *PLoS Pathog* 7:e1001256.
- 697
- 698
- 699

700 **Tables**

701

702

**Table 1. Glycoprotein O and H content in fibroblast-derived cell-free virions.**

703

704

705

706

707

708

709

710

711

712

713

| Name of gO<br>GT mutants | Envelope glycoproteins  |                         |
|--------------------------|-------------------------|-------------------------|
|                          | gO in % [mean (range)]* | gH in % [mean (range)]* |
| GT1c                     | 100                     | 100                     |
| GT2b                     | not detectable          | 53 (14 - 92)            |
| GT3                      | 18 (8 - 28)             | 160 (142 - 178)         |
| GT3/1c                   | 6 (4 - 7)               | not determined          |
| GT1c/3                   | 48 (46 - 50)            | 317 (208 - 425)         |
| GT4                      | 100 (83 - 116)          | 65 (50 - 80)            |
| GT5                      | 67 (53 - 80)            | 70 (40 - 100)           |

\*) normalized to envelope glycoprotein B

714

715

716

717

**Table 2. Dose-inhibition curve characteristics of gO genotype mutant strains.**

718

719

720

721

722

723

724

725

726

727

728

729

| Name of gO<br>GT mutants | sPDGFR $\alpha$ -Fc dose-response curves in HFFs |               | sPDGFR $\alpha$ -Fc dose-response curves in ARPE-19 cells |               | sNRP2-Fc dose-response curves in ARPE-19 cells |               |
|--------------------------|--------------------------------------------------|---------------|-----------------------------------------------------------|---------------|------------------------------------------------|---------------|
|                          | IC <sub>50</sub> in ng/ml [mean (range)]         | slope (range) | IC <sub>50</sub> in ng/ml [mean (range)]                  | slope (range) | IC <sub>50</sub> in ng/ml [mean (range)]       | slope (range) |
| GT1c                     | 58 (52 - 63)                                     | 6.0 - 8.0     | 39 (16 - 53)                                              | 2.6 - 6.0     | 31 (18 - 44)                                   | 0.9 - 1.1     |
| GT2b                     | 73 (54 - 92)                                     | 6.0 - 8.0     | 36 (10 - 51)                                              | 2.6 - 3.0     | 65 (22 - 110)                                  | 1.2 - 1.5     |
| GT3                      | 65 (53 - 82)                                     | 4.8 - 10.0    | 47 (43 - 50)                                              | 4.7 - 6.0     | 34 (27 - 40)                                   | 1.1 - 1.5     |
| GT3/1c                   | 49 (46 - 54)                                     | 6.0 - 9.5     | 50 (49 - 50)                                              | 6.8 - 7.4     | 80 (50 - 110)                                  | 0.9 - 2.1     |
| GT1c/3                   | 69 (56 - 81)                                     | 2.5 - 6.2     | 30 (13 - 62)                                              | 1.0 - 2.6     | 65 (34 - 100)                                  | 0.9 - 1.3     |
| GT4                      | 52 (47 - 55)                                     | 5.5 - 6.0     | 55 (52 - 56)                                              | 5.3 - 6.0     | 90 (60 - 110)                                  | 0.7 - 1.3     |
| GT5                      | 68 (45 - 100)                                    | 5.3 - 8.0     | 56 (54 - 58)                                              | 5.3 - 6.0     | 67 (24 - 110)                                  | 1.2 - 1.7     |

730

731

The data shown are the results of two to five independent experiments. IC<sub>50</sub> and slope values were calculated from [inhibitor] vs. response four-parameter dose-response curves.

732

733

734

735 **Supplementary Table**

736

737

| Supplementary Table 1. Primer sequences for en passant mutagenesis |                  |                                        |                                                                                          |                                                                                            |                                     |
|--------------------------------------------------------------------|------------------|----------------------------------------|------------------------------------------------------------------------------------------|--------------------------------------------------------------------------------------------|-------------------------------------|
| TB40-BAC4-luc-derived gO GT mutants                                | Template for PCR | PCR product                            | Forward primer (5' – 3')                                                                 | Reverse primer (5' – 3')                                                                   | BAC-DNA for recombination in GS1783 |
| ΔgO                                                                | pEPKan-S         | Recombination cassette                 | CAGAACTTTACTGCAACCACCAAAAGG<br>CTATTGAGGTTCCCAATGACAGAGGAGGA<br>ATAGGGATAACAGGGTAATCGATT | GCAGACGGACGGTGCGGGGTTTCCTCT<br>CTGTCAATGGGAACCCCTCAATAGCCTTGG<br>GTGGCCAGTGTACAACCAATTAACC | TB40-BAC4-luc                       |
| GT2b                                                               | pEPKan-S         | Insert for cloning into pEX-A258-Pgt2b | TAAGGAGCTCATGTTGAGAGTACCGTAAA<br>TAGTGTACGGGTTTCGTTACGGATCTAGG<br>GATAACAGGGTAATCGATT    | GCCAGTGTACAACCAATTA                                                                        |                                     |
|                                                                    | Transferplasmid  | Recombination cassette                 | GATGGGAGCCTTTTGATCGTA                                                                    | GCCAAACCACAAGGCAGA                                                                         | TB40-BAC4-lucΔgO                    |
| GT5                                                                | pEPKan-S         | Insert for cloning into pEX-K4-Pgt5    | TAAGGAGCTCATGTCGAAGAGTGCCATAAA<br>TAGTGTACGGGTTTCGTTACGAATCTAGG<br>GATAACAGGGTAATCGATT   | TAGCGAGCTCGCCAGTGTACAACCAATT<br>AACC                                                       |                                     |
|                                                                    | Transferplasmid  | Recombination cassette                 | GGAGCCTTTTGATCGTACTACGACATTGC<br>TGCTTTCAGAACTTTACTGCGACCACCAACC<br>AAAGGCTATTG          | AAACCACAAGGCAGACGGACGGTGCCGG<br>GGTTTCCTCCTGTCAATGGGAAAAAAG<br>AGATGATAATGGTGAAAGGC        | TB40-BAC4-lucΔgO                    |
| GT3; GT3/1c; GT1c/3                                                | pEPKan-S         | Insert for cloning into pEX-K4-Pgt3    | TAAGGAGCTCATGTCGAAGAGTGCCGTA<br>TAGTGTACGGGTTTCGTTGCGAATCTAGG<br>GATAACAGGGTAATCGATT     | TAGCGAGCTCGCCAGTGTACAACCAATT<br>AACC                                                       |                                     |
|                                                                    | Transferplasmid  | Recombination cassette                 | TTGCTGCTTTCAGAACTTTACTGCAACCAC<br>CACCAAAGGCTATTGAGGGTAGACAGATT<br>TACAGCCCGGC           | CAAGGCAGACGGACGGTGCGGGGTTTCC<br>TCCTGTCAATGGGAGAAAAAGGAGAGAT<br>GAGAGGTGTTTTAACTTAT        | TB40-BAC4-luc in GS1783             |

746

747

748 **Figures**

749

750 **Figure 1.**

751

752

753

754

755

756

757

758

759

760

761

762

763

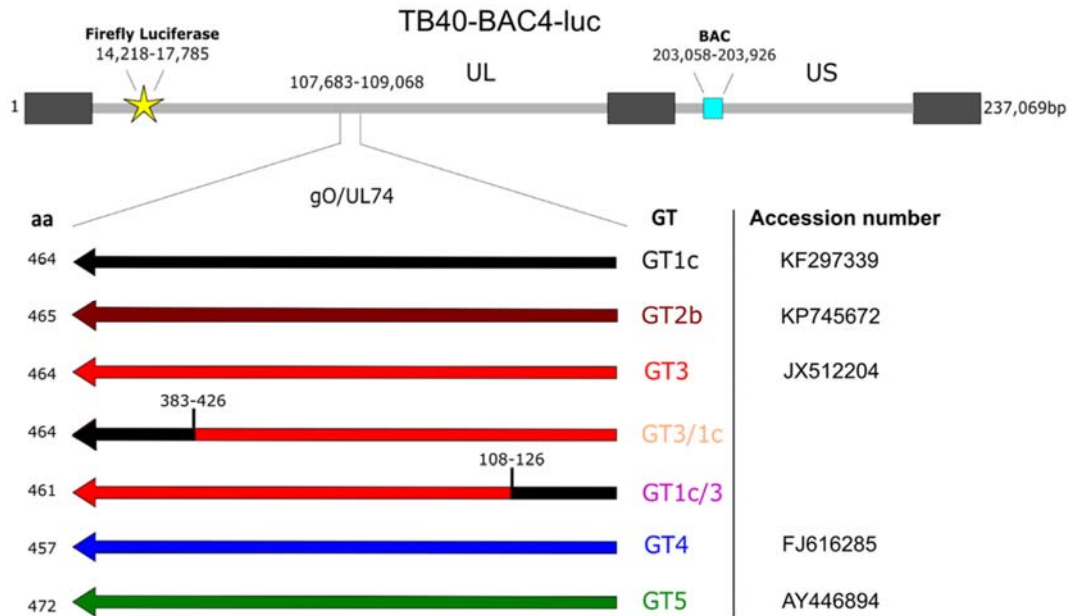

764 **Figure 1. Schematic illustration of BAC-derived gO genotype mutants.** The resident gO genotype (GT)

765 1c sequence of parental strain TB40-BAC4-luc was fully or partially replaced by the indicated gO GT

766 sequences via „en passant“ mutagenesis. Main genome characteristics are displayed. Arrows

767 represent orientation and position of gO ORFs upon GT swapping. GTs and accession numbers of the

768 HCMV strains from which the respective gO GT sequences are derived are shown on the right and the

769 length of gO amino acid (aa) sequence on the left. Aa range of the recombination breakpoint of the

770 chimeric mutants GT3/1c and GT1c/3 are depicted above the ORF. Cell-free bacterial artificial

771 chromosome-derived mutant virus stocks were generated upon reconstitution in human foreskin

772 fibroblasts.

773



774 **Figure 2.**

775

776

777

778

779

780

781

782

783

784

785

786

787 **Figure 2. Cell-free infectivity of gO genotype mutants for fibroblasts and epithelial cells.** A) Human  
788 foreskin fibroblasts (HFFs) were infected with parental strain gO GT1c and the panel of gO GT mutants  
789 using similar numbers of encapsidated genome equivalents (range: 8.0 – 9.2 log<sub>10</sub> copies/ml). Two days  
790 post infection relative light units (RLUs) were assessed in cell lysates by luciferase assay as a read out  
791 of infection efficiency. Log<sub>10</sub> RLU to genome ratio was calculated and the fold change relative to gO  
792 GT1c was determined. All experiments were performed in triplicates and data shown are means ± SEM  
793 of 2 - 4 independent experiments. B) HFFs and ARPE-19 cells were simultaneously infected with  
794 parental strain gO GT1c and the gO GT mutants using the same virus preparation for both cell types.  
795 Two days post infection RLUs were determined and the ratio of fibroblast to epithelial cell RLUs was  
796 calculated. All experiments were performed in triplicates and data shown are means ± SEM of 3 - 4  
797 independent experiments. Statistical significance was evaluated by ANOVA with Tukey's test for  
798 multiple comparison. \*\*\*\*p<0.0001; \*\*p<0.01; \*p<0.05 in comparison to GT1c.

799

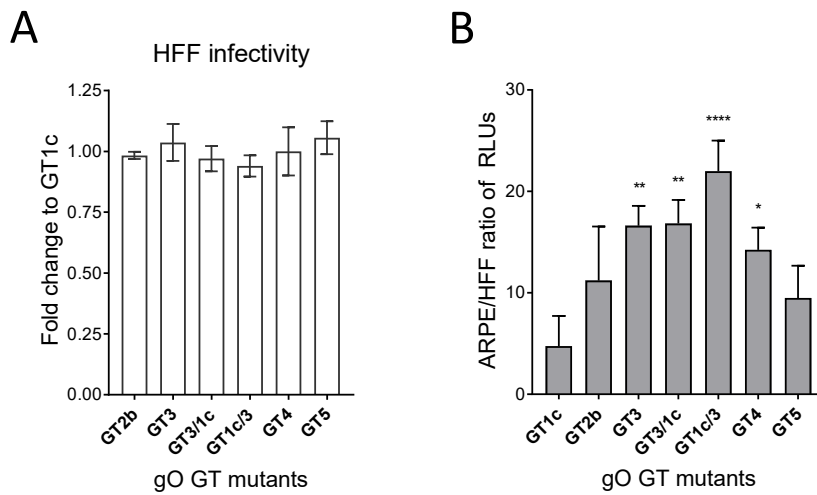

800 **Figure 3.**

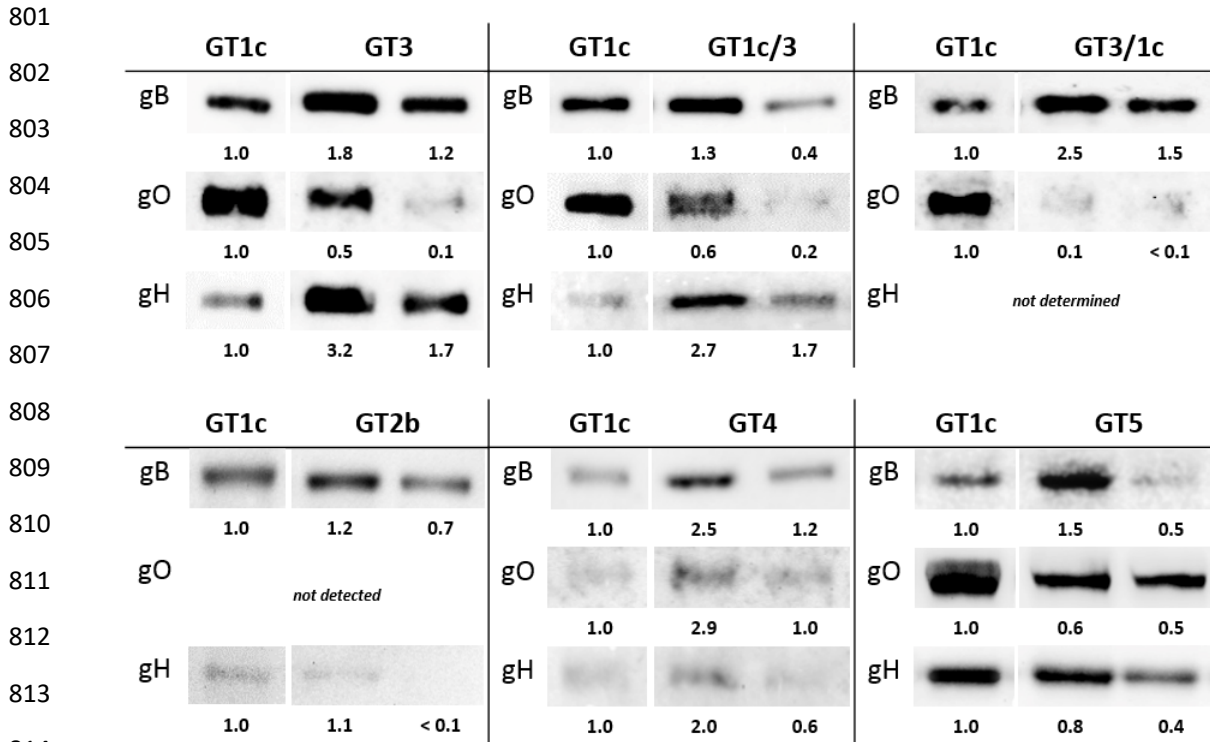

815

816 **Figure 3. Comparison of gO and gH content in cell-free virions between parental strain gO GT1c and**  
 817 **gO mutants.** Virions harvested from human foreskin fibroblast supernatant were subjected to reducing  
 818 gel electrophoresis and analyzed by Western Blot using antibodies directed against glycoproteins gB  
 819 (anti-gB mAb 2F12), gO (anti-gO.02 mAb) and gH (AP86-SA4). The amount of virions loaded on the gels  
 820 were compared to gB. Contents of gO and gH were compared between gO GT1c and the respective gO  
 821 mutants. For each mutant an additional 2-fold dilution was loaded on the gel. Band densities were  
 822 determined relative to the GT1c reference band for each blot individually, and are shown below the  
 823 blots.

824

825 **Figure 4.**

826

827

828

829

830

831

832

833

834

835

836

837

838

839

840

841

842

843

844

845

846

847

848

849

850

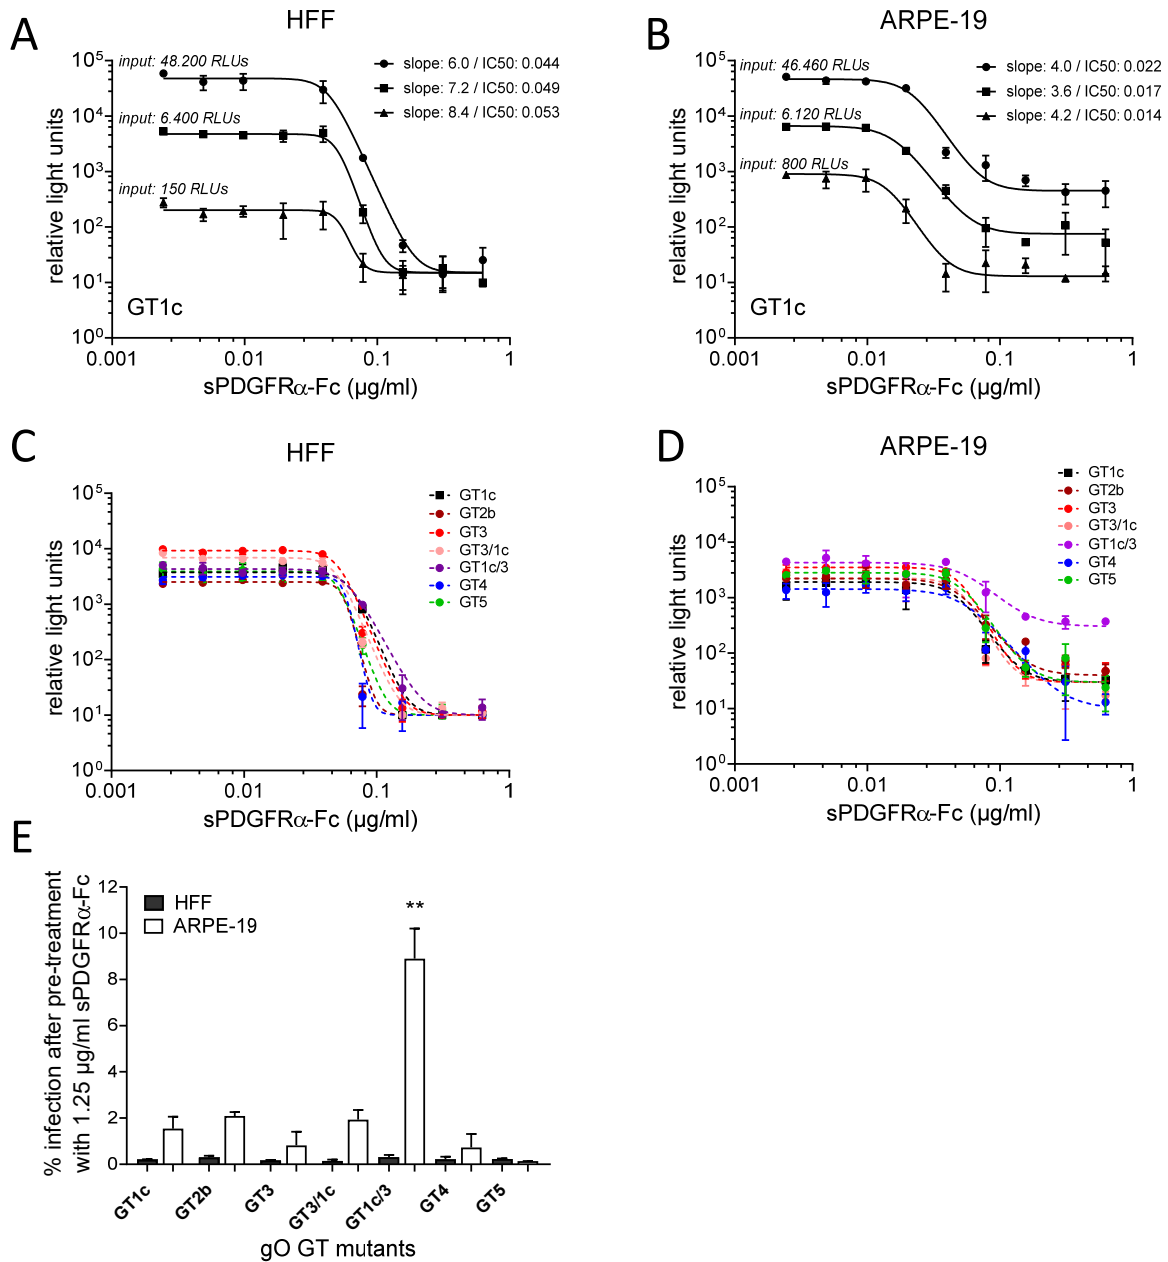

851 **Figure 4. Inhibition of cell-free infectivity of gO genotype mutant viruses by soluble PDGFR $\alpha$ -Fc.** The  
 852 whole panel of gO genotype (GT) mutants along with parental strain gO GT1c were pre-incubated with  
 853 soluble PDGFRalpha-Fc (sPDGFR $\alpha$ -Fc) before infection of human foreskin fibroblasts (HFFs) or adult  
 854 retinal pigment epithelial cells 19 (ARPE-19 cells), respectively. Two days after infection relative light  
 855 units (RLUs) were determined in cell lysates by a luciferase assay. In (A) and (B) three different virus  
 856 stock concentrations of parental strain gO GT1c indicated as input RLUs are used. In (C to E) mutant

857 virus stocks were diluted to achieve RLUs ranging from 1.000 to 19.000 without treatment. In (A to D)  
858 parental and mutant virus stocks were treated with serial 2-fold dilutions of sPDGFR $\alpha$ -Fc (range: 0.625  
859 to 0.0244  $\mu$ g/ml). Monitored RLUs were plotted against sPDGFR $\alpha$ -Fc concentrations. Four-  
860 parameter dose-response curves were generated and the protein concentration causing inhibition of  
861 50% of infection (IC50) and the steepness of the curves were calculated (see in A and B and in Table  
862 1). In (C) and (D) one representative curve from each mutant out of 2 – 4 independent experiments is  
863 shown. Data represent mean values  $\pm$  SDs of triplicate determinations. In (E) the % of infection of HFFs  
864 or ARPE-19 cells, respectively, after pre-treatment with 1.25 $\mu$ g/ml sPDGFR $\alpha$ -Fc is shown. Experiments  
865 were performed in triplicates and data are means  $\pm$  SEM of 3 - 5 independent experiments. Statistical  
866 significance was evaluated by ANOVA with Tukey's test for multiple comparison. \*\* $p$ <0.01 in  
867 comparison to GT1c.  
868

869 **Figure 5.**

870

871

872

873

874

875

876

877

878

879

880

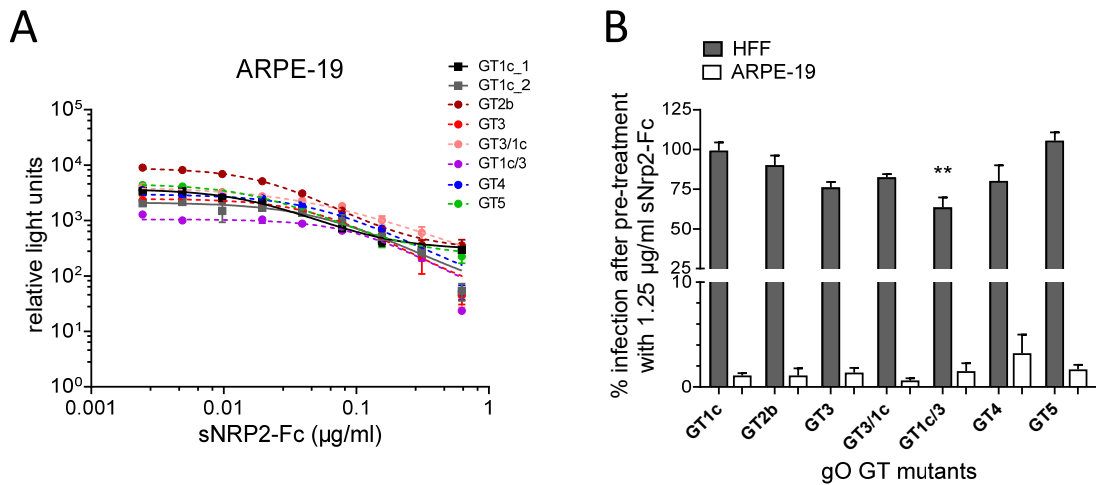

881 **Figure 5. Inhibition of cell-free infectivity of gO genotype mutant viruses by soluble NRP2-Fc.** A)

882 Parental gO GT1c and gO GT mutant virus stocks were pre-incubated with serial 2-fold dilutions of

883 soluble NRP2-Fc (sNRP2-Fc) (range: 0.625 to 0.0244  $\mu\text{g/ml}$ ) before infection of adult retinal pigment

884 epithelial cells 19 (ARPE-19 cells). Two days after infection relative light units (RLUs) were monitored

885 ranging from 1.000 to 10.000 RLUs in untreated controls. RLUs were plotted against sNRP2-Fc

886 concentrations and four-parameter dose-response curves were generated to calculate the protein

887 concentration causing inhibition of 50% of infection (IC50) and to determine the steepness of the

888 curves. Two curves from gO GT1c and one representative curve from each mutant out of 2

889 independent experiments is shown. Virus stock concentrations used were similar as for (A). Data

890 represent mean values  $\pm$  SDs of triplicate determinations. B) The % of infection of HFFs or ARPE-19

891 cells, respectively, after pre-treatment with 1.25 $\mu\text{g/ml}$  sNRP2-Fc is shown. Experiments were

892 performed in triplicates and data are means  $\pm$  SEM of 3 - 5 independent experiments. Statistical

893 significance was evaluated by ANOVA with Tukey's test for multiple comparison. \*\* $p < 0.01$  in

894 comparison to GT1c.

895

896 **Supplementary figures**

897

898 **Figure S1**

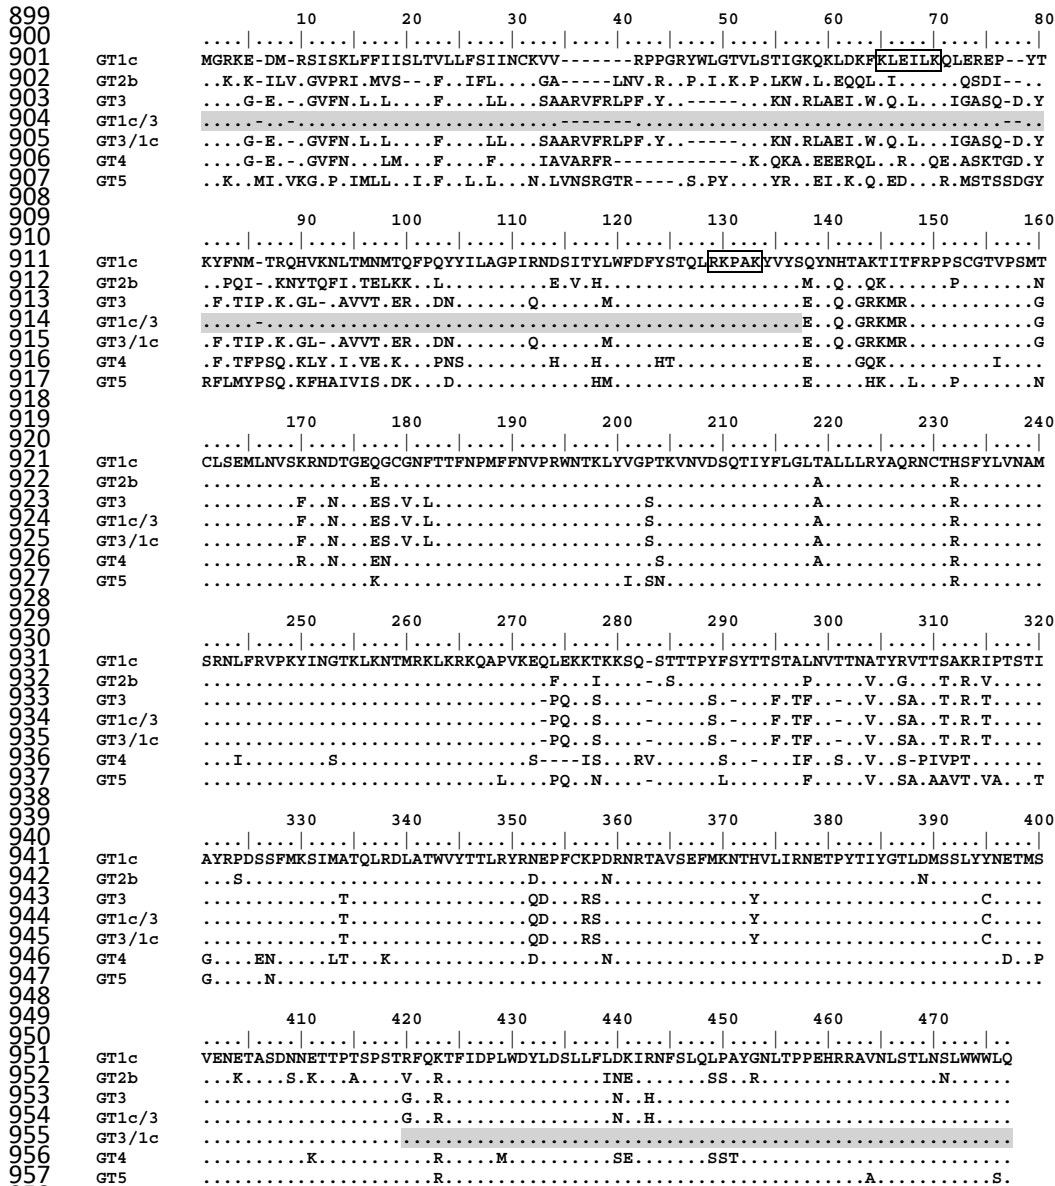

961 **Supplementary Figure S1: Amino acid alignment of gO genotype mutant sequences.** Reference  
 962 sequence of genotype (GT) 1c (TB40-BAC4; [ABV71596.1](#)) is aligned with GT2b (BE/29/2011;  
 963 [AKI14139.1](#)), GT3 (HAN16; [AFR55727.1](#)), GT4 (Towne, [ACM48052.1](#)), gO GT5 (Merlin, [AAR31626.1](#)),  
 964 and the two recombinant forms, GT1c/3 and GT3/1c. Putative PDGFRalpha binding sites as  
 965 characterized recently (Stegmann et al., 2019) are depicted by black boxes. The grey-shaded regions  
 966 of recombinant GT1c/3 and GT3/1c mutants indicate the GT1c sequence part.

967

968 **Figure S2**

969

970

971

972

973

974

975

976

977

978

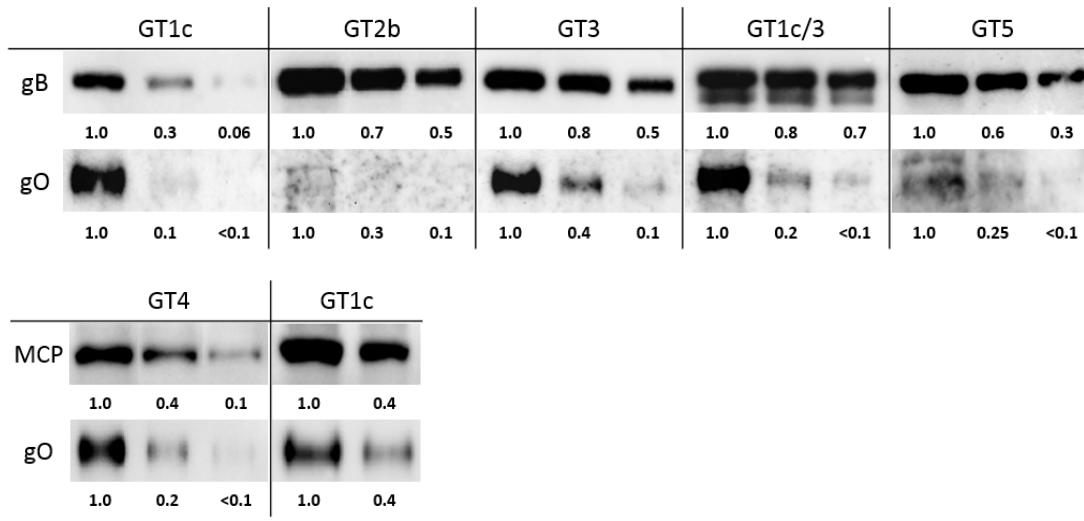

979 **Supplementary Figure S2. Reactivity of monoclonal anti-gO antibody, anti-gO.02 mAb, against**  
980 **distinct gO genotypic forms.** Two to three 2-fold dilutions of virions were loaded on the gels. Reactivity  
981 against gO was compared to reactivity directed against gB (anti-gB mAb 2F12) or major capsid protein  
982 (MCP).
